# Supplementary material for: CoxFeyN nanoparticles decorated on graphene sheets as high-performance electrocatalysts for the oxygen evolution reaction
Source: Royal Society of Chemistry journal article supplement (doi:10.1039/c9ta01347d), 2019-01-01
Supplement: c9ta01347d1.pdf [file c9ta01347d1.pdf]

**Supporting Information for:**

**Co<sub>x</sub>Fe<sub>y</sub>N Nanoparticles Decorated on Graphene Sheets as High-Performance  
Electrocatalysts for Oxygen Evolution Reaction**

**Authors:** Haixia Liu,<sup>a</sup> Xinyao Lu,<sup>a</sup> Yi Hu,<sup>a</sup> Renpeng Chen,<sup>a</sup> Peiyang Zhao,<sup>a</sup> Lei  
Wang,<sup>a</sup> Guoyin Zhu,<sup>a</sup> Lianbo Ma<sup>a</sup> and Zhong Jin<sup>\*ab</sup>

<sup>a</sup> *Key Laboratory of Mesoscopic Chemistry of MOE, Jiangsu Key Laboratory of Advanced Organic  
Materials, School of Chemistry and Chemical Engineering, Nanjing University, Nanjing 210023,  
China.*

<sup>b</sup> *Shenzhen Research Institute of Nanjing University, Shenzhen 518063, China.*

\*E-mail address of corresponding author: [zhongjin@nju.edu.cn](mailto:zhongjin@nju.edu.cn) (Z. Jin)

**Table S1.** The comparison of OER catalytic parameters of CoxFeyN/graphene with other previous reported electrode materials.

| Catalyst                                                   | Substrate                  | $\eta^{10}$<br>(mV) | Electrolyte | Stability retention                                                                 | Ref               |
|------------------------------------------------------------|----------------------------|---------------------|-------------|-------------------------------------------------------------------------------------|-------------------|
| Co <sub>3</sub> Fe <sub>1</sub> N/graphene                 | RDE                        | 266                 | 1 M KOH     |                                                                                     | <b>This study</b> |
| Co <sub>3</sub> Fe <sub>1</sub> N/graphene                 | Carbon Paper               |                     | 1 M KOH     | After testing for 4 h and 16 h are compared, the overpotential increased about 5 mV | <b>This study</b> |
| FeCo-Co <sub>4</sub> N/N-C                                 | RDE                        | 280                 | 1 M KOH     | 79.9% after 12 h at 10 mA/cm <sup>2</sup>                                           | Rf S1             |
| NiCo <sub>2</sub> N/NF                                     | Ni Foam                    | 260                 | 1 M KOH     | Almost 100% after 40 h at 10 mA/cm <sup>2</sup>                                     | Rf 29             |
| Ni <sub>3</sub> FeN nanoparticles                          | Glass Carbon               | 280                 | 1 M KOH     | Almost 100% after 9 h, at 10 mA/cm <sup>2</sup>                                     | Rf 31             |
| Pt/C                                                       | Glass Carbon               |                     | 1 M KOH     | exhibited a negligible OER activity                                                 | Rf 31             |
| RuO <sub>2</sub>                                           | RED                        | 330                 | 1 M KOH     | 65.2%, after 12 h, at 10 mA/cm <sup>2</sup>                                         | Rf S1             |
| IrO <sub>2</sub>                                           | Modified working electrode | 338                 | 1 M KOH     | the overpotential increased 94 mV after 6 h at 10 mA/cm <sup>2</sup>                | Rf S2             |
| Pyrolyzed IrO <sub>2</sub>                                 | RED                        | 345                 | 1 M KOH     | 30% at $\eta = 0.37$ V after 250 min                                                | Rf S3             |
| Leached-Ir <sub>0.7</sub> Co <sub>0.3</sub> O <sub>x</sub> | RDE                        | 320                 | 1 M KOH     | 65% at $\eta = 0.37$ V after 250 min                                                | Rf S3             |

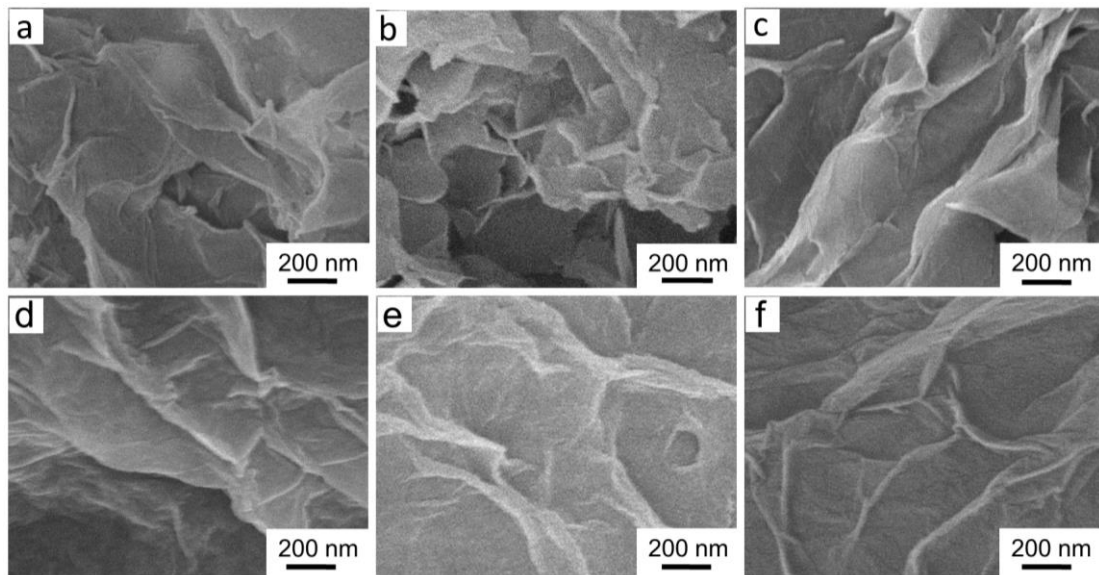

**Figure S1.** SEM images of ultrathin  $\text{Co}_x\text{Fe}_y\text{-LDH/graphene}$  nanosheets: (a)  $\text{Co}(\text{OH})_2/\text{graphene}$ , (b)  $\text{Co}_{3.6}\text{Fe}_{0.4}\text{-LDH/graphene}$ , (c)  $\text{Co}_3\text{Fe}_1\text{-LDH/graphene}$ , (d)  $\text{Co}_2\text{Fe}_2\text{-LDH/graphene}$ , (e)  $\text{Co}_1\text{Fe}_3\text{-LDH/graphene}$  and (f)  $\text{Fe}(\text{OH})_3/\text{graphene}$ , respectively.

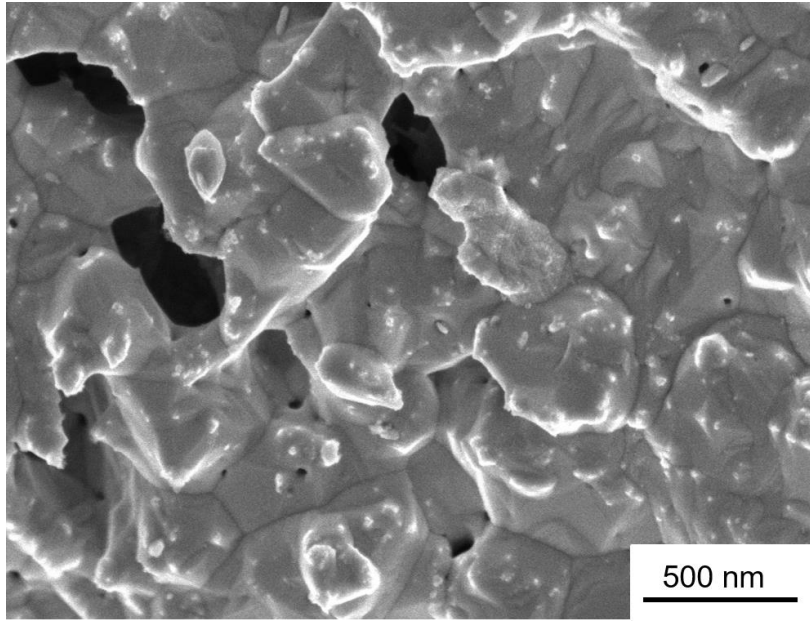

**Figure S2.** The SEM image of  $\text{Co}_3\text{Fe}_1\text{N}$  control sample without graphene.

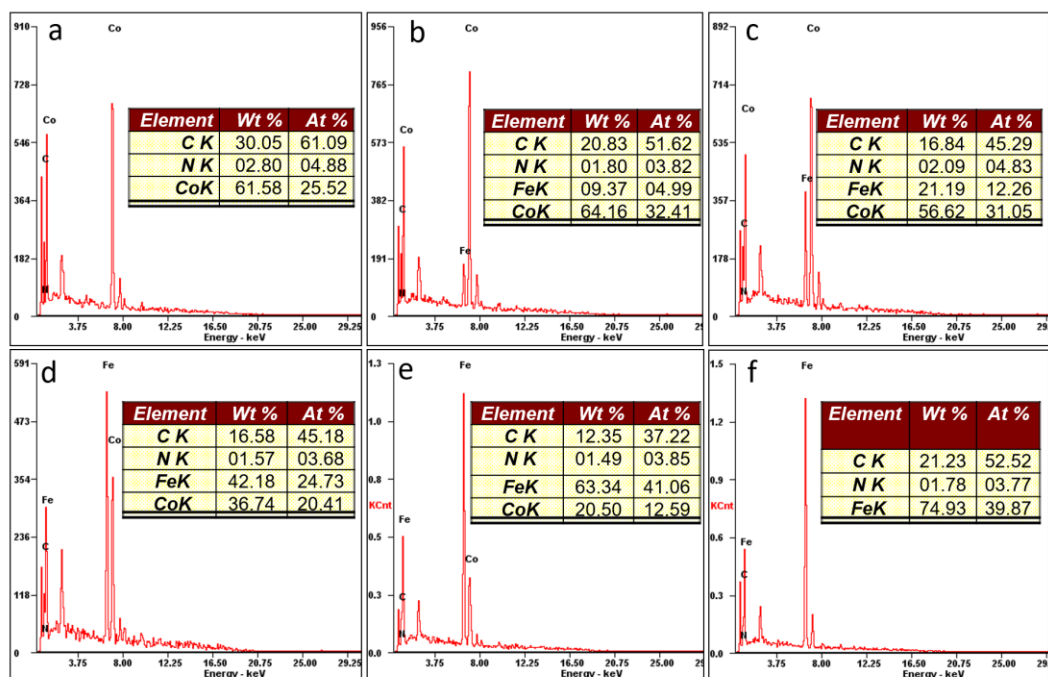

**Figure S3.** EDX spectra of  $\text{Co}_x\text{Fe}_y\text{N}/\text{graphene}$  catalysts: (a)  $\text{Co}_4\text{N}/\text{graphene}$ , (b)  $\text{Co}_{3.6}\text{Fe}_{0.4}\text{N}/\text{graphene}$ , (c)  $\text{Co}_3\text{Fe}_1\text{N}/\text{graphene}$ , (d)  $\text{Co}_2\text{Fe}_2\text{N}/\text{graphene}$ , (e)  $\text{Co}_1\text{Fe}_3\text{N}/\text{graphene}$  and (f)  $\text{Fe}_4\text{N}/\text{graphene}$ , respectively.

**Table S2.** ICP-OES analysis of Co<sub>x</sub>Fe<sub>y</sub>N/graphene samples.

| Catalysts                                      | Atomic ratio n(Co) : n(Fe) |
|------------------------------------------------|----------------------------|
| Co <sub>3.6</sub> Fe <sub>0.4</sub> N/graphene | 0.99 : 0.11                |
| Co <sub>3</sub> Fe <sub>1</sub> N/graphene     | 0.86 : 0.26                |
| Co <sub>2</sub> Fe <sub>2</sub> N/graphene     | 0.47 : 0.52                |
| Co <sub>1</sub> Fe <sub>3</sub> N/graphene     | 0.25 : 0.81                |

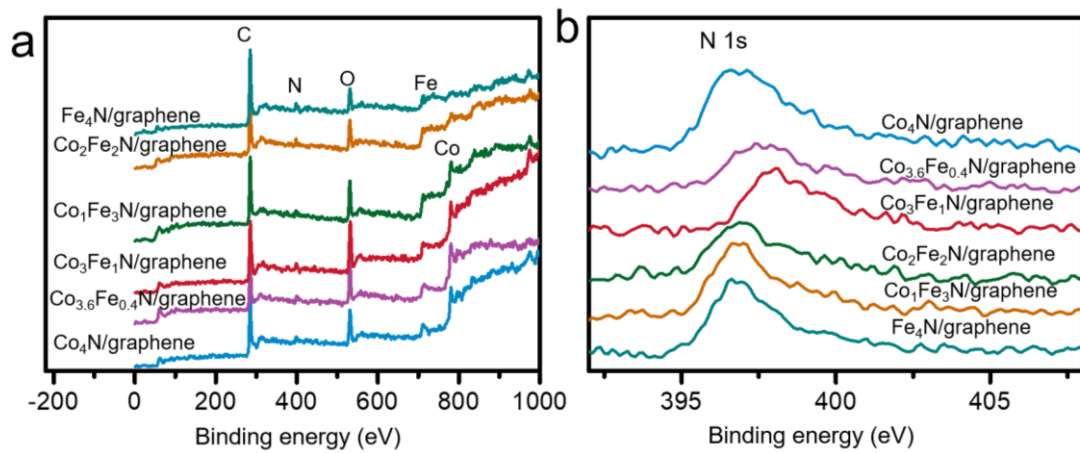

**Figure S4.** (a) XPS survey spectra and (b) High-resolution XPS spectra at N 1s region of  $\text{Co}_x\text{Fe}_y\text{N}/\text{graphene}$  samples, respectively.

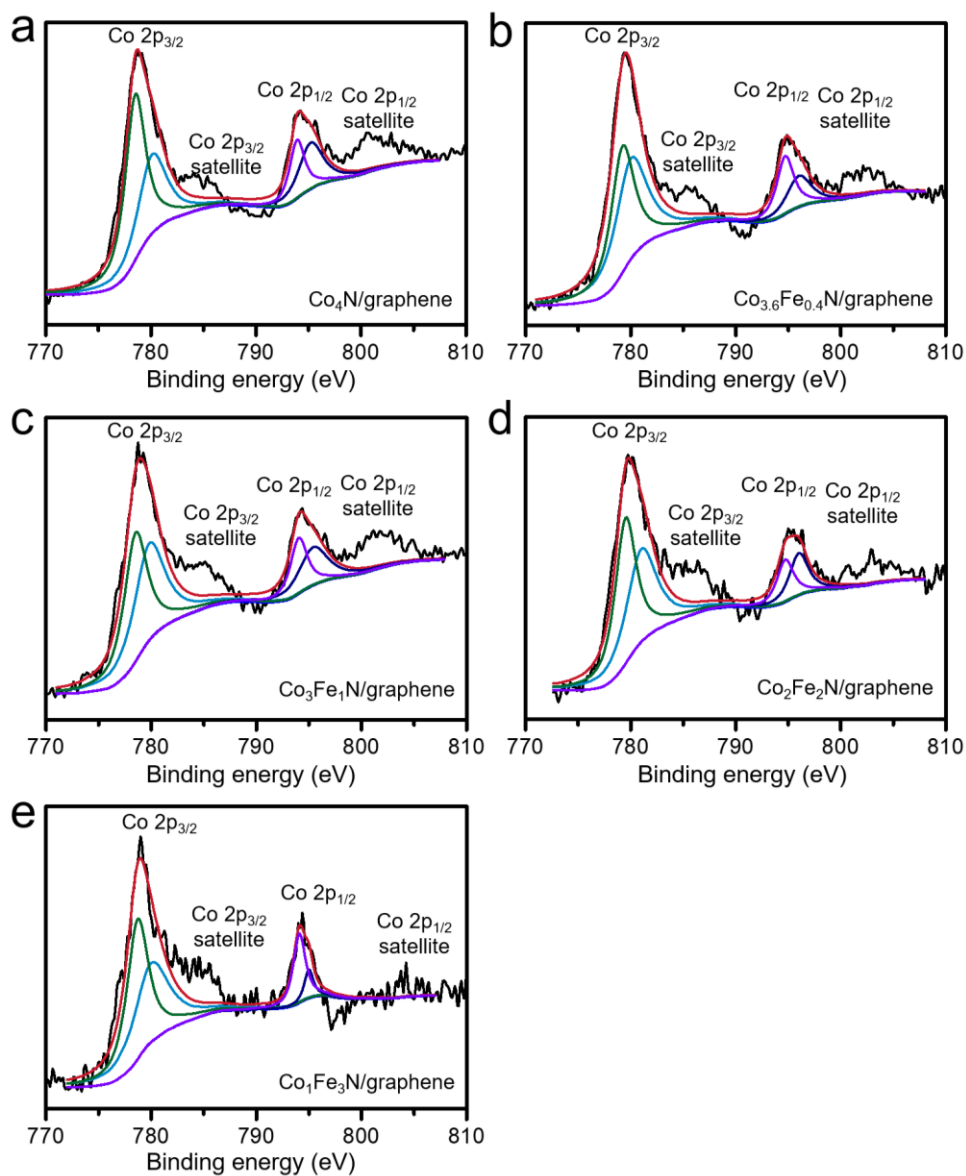

**Figure S5.** XPS spectra at Co 2p region of  $\text{Co}_x\text{Fe}_y\text{N}/\text{graphene}$  catalysts: (a)  $\text{Co}_4\text{N}/\text{graphene}$ , (b)  $\text{Co}_{3.6}\text{Fe}_{0.4}\text{N}/\text{graphene}$ , (c)  $\text{Co}_3\text{Fe}_1\text{N}/\text{graphene}$ , (d)  $\text{Co}_2\text{Fe}_2\text{N}/\text{graphene}$ , and (e)  $\text{Co}_1\text{Fe}_3\text{N}/\text{graphene}$ , respectively.



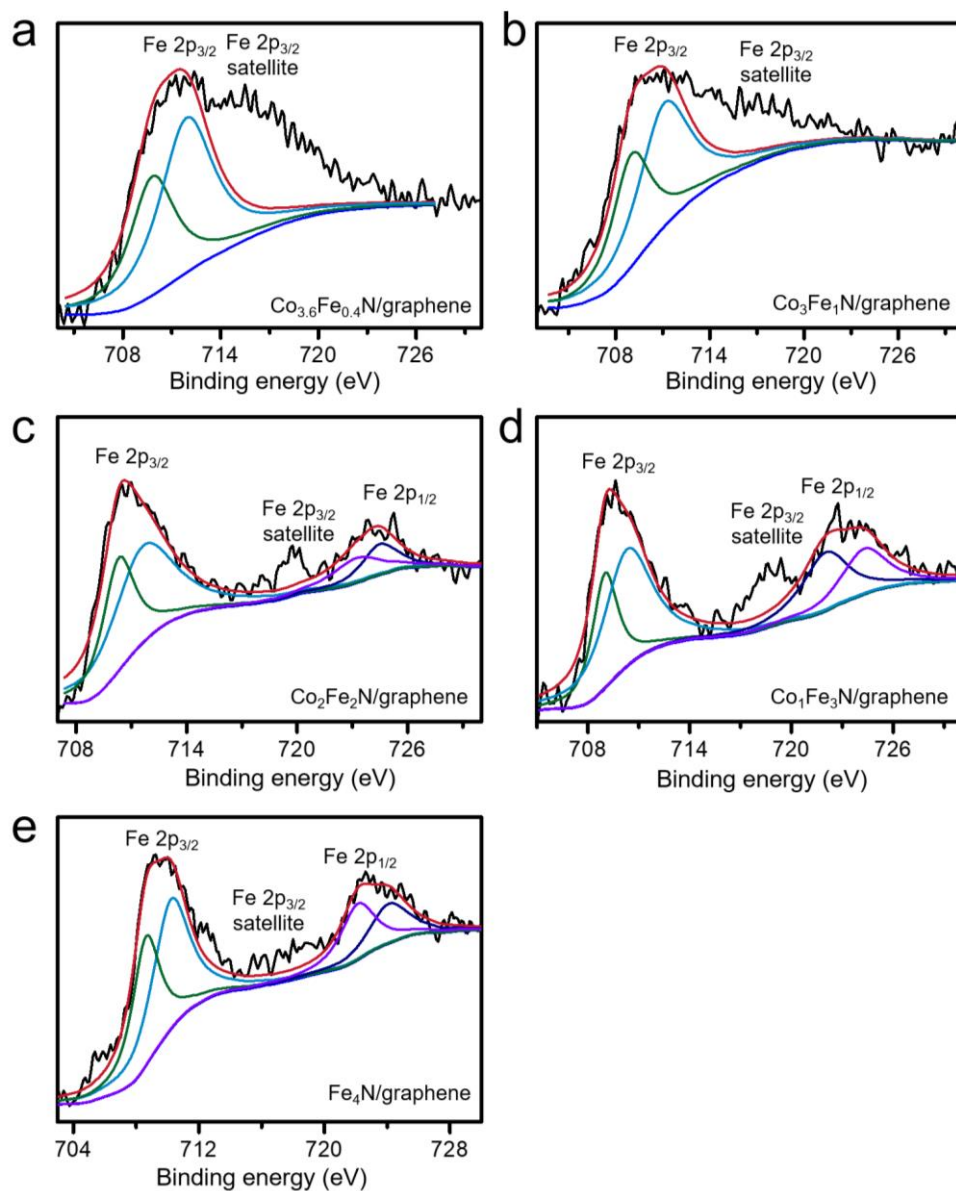

**Figure S6.** XPS spectra at Fe 2p region of Co<sub>x</sub>Fe<sub>y</sub>N/graphene catalysts: (a) Co<sub>3.6</sub>Fe<sub>0.4</sub>N/graphene, (b) Co<sub>3</sub>Fe<sub>1</sub>N/graphene, (c) Co<sub>2</sub>Fe<sub>2</sub>N/graphene, (d) Co<sub>1</sub>Fe<sub>3</sub>N/graphene and (e) Fe<sub>4</sub>N/graphene, respectively.

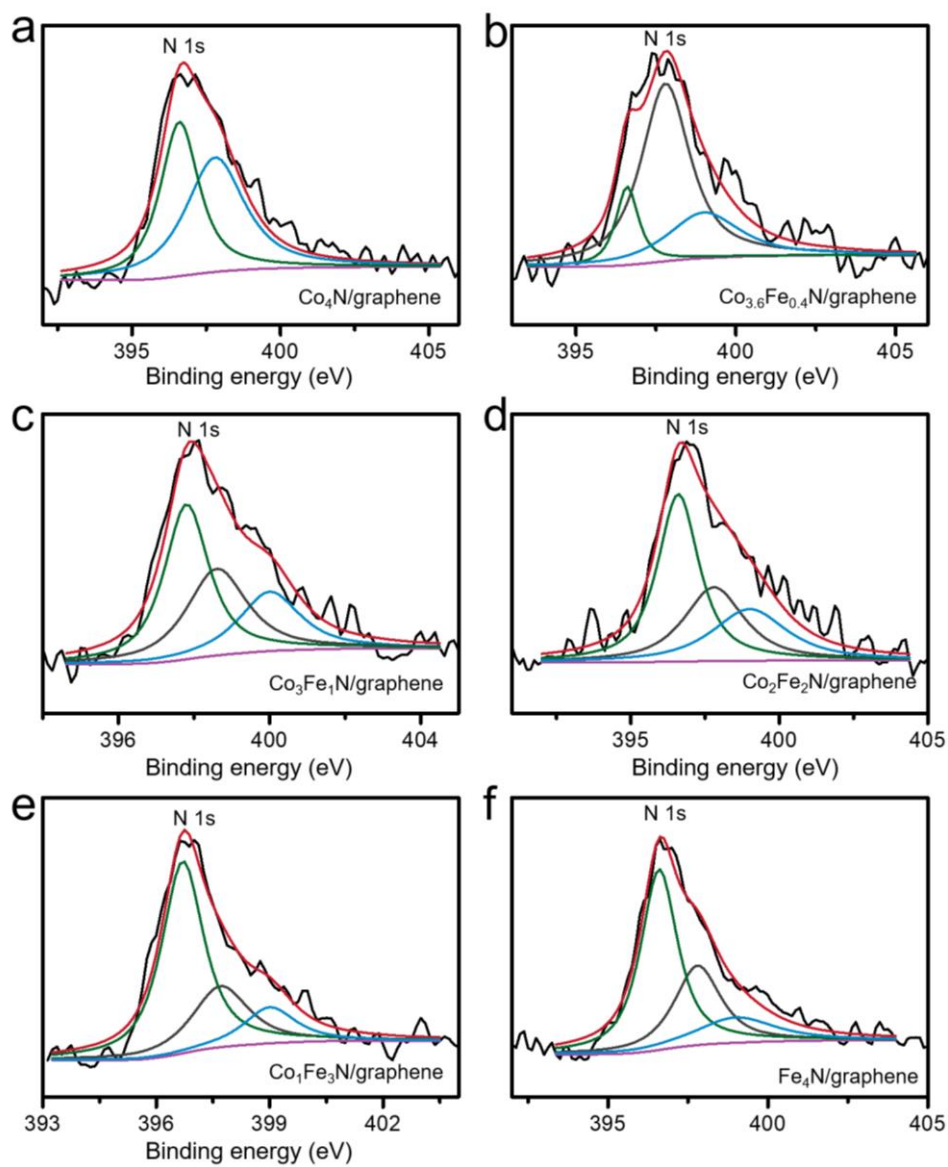

**Figure S7.** XPS spectra at N 1s region of  $\text{Co}_x\text{Fe}_y\text{N}/\text{graphene}$  catalysts: (a)  $\text{Co}_4\text{N}/\text{graphene}$ . (b)  $\text{Co}_{3.6}\text{Fe}_{0.4}\text{N}/\text{graphene}$ , (c)  $\text{Co}_3\text{Fe}_1\text{N}/\text{graphene}$ , (d)  $\text{Co}_2\text{Fe}_2\text{N}/\text{graphene}$ , (e)  $\text{Co}_1\text{Fe}_3\text{N}/\text{graphene}$  and (f)  $\text{Fe}_4\text{N}/\text{graphene}$ , respectively.

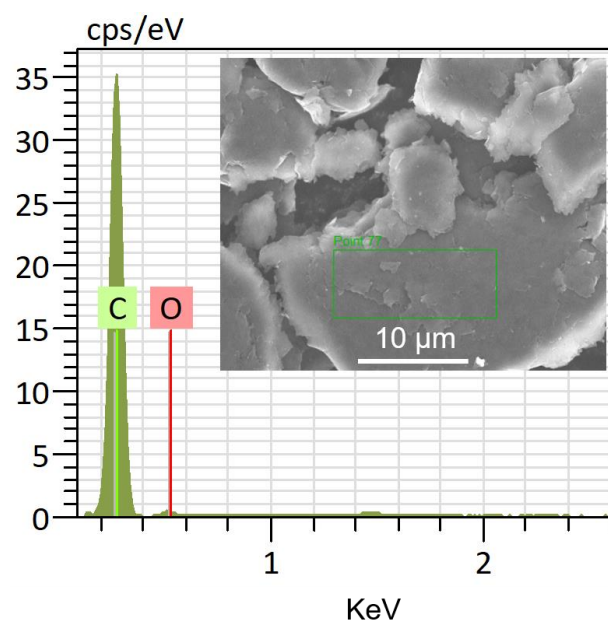

**Figure S8.** EDX spectrum of pristine graphene treated at 600 °C for 3 h under ammonia atmosphere.

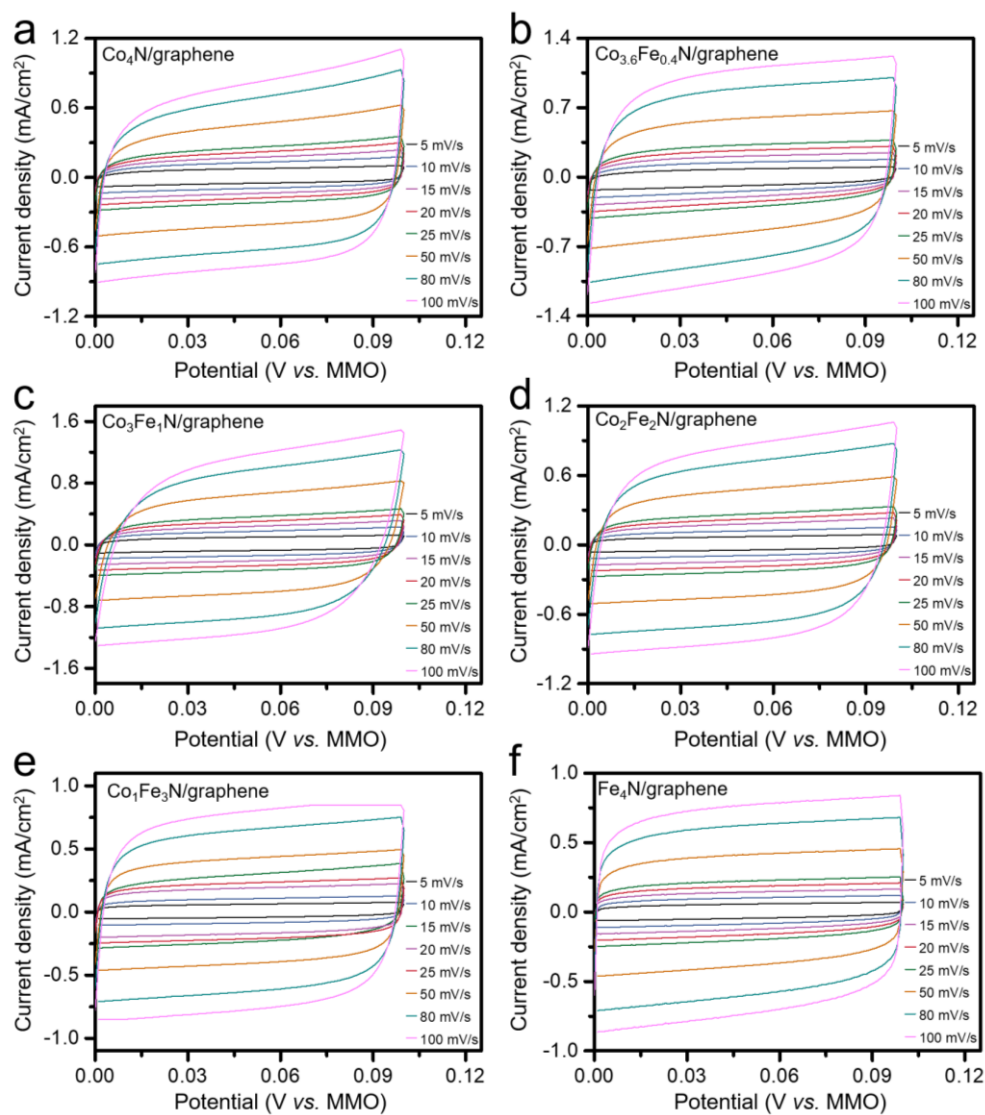

**Figure S9.** (a-f) Cyclic voltammograms (CVs) of  $\text{Co}_x\text{Fe}_y\text{N}/\text{graphene}$  samples at different scan rates from 5 to 100 mV/s between 0-0.1 V vs. Hg/HgO reference electrode (MMO) in 1.0 M KOH.

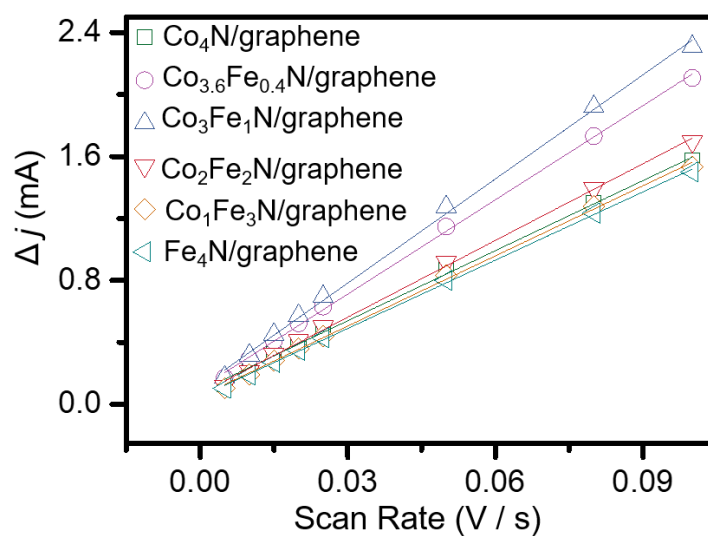

**Figure S10.**  $C_{dl}$  values of  $Co_xFe_yN/graphene$  samples at 0.05 V vs. MMO. The  $C_{dl}$  values are calculated to be: 15.09  $mF\ cm^{-2}$  for  $Co_4N/graphene$ , 20.29  $mF\ cm^{-2}$  for  $Co_{3.6}Fe_{0.4}N/graphene$ , 22.41  $mFcm^{-2}$   $Co_3Fe_1N/graphene$ , 16.51  $mFcm^{-2}$  for  $Co_2Fe_2N/graphene$ , 15.10  $mFcm^{-2}$  for  $Co_1Fe_3N/graphene$  and 14.69  $mFcm^{-2}$  for  $Fe_4N/graphene$ , respectively. These results indicate that  $Co_3Fe_1N/graphene$  has the largest  $C_{dl}$  value and ECSA among the samples.

## Reference

- S1. X. hu, T. Jin, C. Tian, C. Lu, X. Liu, M. Zeng, X. Zhuang, S. Yang, L. He, H. Liu, S. Dai, *Adv. Mater.* 2017, **29**, 1704091
- S2 F. Song, X. L. Hu, *Nature Commun.* 2014, **5**, 4477.
- S3 W. Hu, H. Zhong, W. Liang, S. Chen, *ACS Appl. Mater. Interfaces* 2014, **6**, 12729-12736.
